# Supplementary material
Source: bioRxiv or medRxiv preprint supplement (https://www.biorxiv.org/highwire/filestream/50109/field_highwire_adjunct_files/0/035675-1.pdf)

# Supporting Information for “A direct approach to estimating false discovery rates conditional on covariates”

Simina M. Boca and Jeffrey T. Leek

June 19, 2017

## 1 Proofs of analytical results

### Proof of Theorem 3

$$\begin{aligned} E[Y_i | \mathbf{X}_i = \mathbf{x}_i] &= Pr(P_i > \lambda | \mathbf{X}_i = \mathbf{x}_i) \\ &= Pr(P_i > \lambda | \theta_i = 1, \mathbf{X}_i = \mathbf{x}_i) P(\theta_i = 1 | \mathbf{X}_i = \mathbf{x}_i) \\ &+ Pr(P_i > \lambda | \theta_i = 0, \mathbf{X}_i = \mathbf{x}_i) P(\theta_i = 0 | \mathbf{X}_i = \mathbf{x}_i). \end{aligned}$$

Then, using the assumption that conditional on the null, the p-values do not depend on the covariates:

$$\begin{aligned} E[Y_i | \mathbf{X}_i = \mathbf{x}_i] &= Pr(P_i > \lambda | \theta_i = 1) P(\theta_i = 1 | \mathbf{X}_i = \mathbf{x}_i) \\ &+ Pr(P_i > \lambda | \theta_i = 0) P(\theta_i = 0 | \mathbf{X}_i = \mathbf{x}_i) \\ &= (1 - \lambda) \pi_0(\mathbf{x}_i) + \{1 - G(\lambda)\} \{1 - \pi_0(\mathbf{x}_i)\}. \end{aligned}$$

### Proof of Corollary 4

Applying the law of iterated expectations:

$$E[Y_i] = E[E[Y_i | \mathbf{X}_i]] = (1 - \lambda) E[\pi_0(\mathbf{X}_i)] + \{1 - G(\lambda)\} \{1 - E[\pi_0(\mathbf{X}_i)]\}.$$

We complete the proof by using:

$$\begin{aligned} \pi_0 &= Pr(\theta_i = 1) = \int Pr(\theta_i = 1, \mathbf{X}_i = \mathbf{x}) d\nu(\mathbf{x}) \\ &= \int Pr(\theta_i = 1 | \mathbf{X}_i) dF_{\mathbf{X}_i} = E[Pr(\theta_i = 1 | \mathbf{X}_i)] = E[\pi_0(\mathbf{X}_i)], \end{aligned}$$

where  $\nu$  is typically either the Lebesgue measure over a subset  $\mathbb{R}$  or the counting measure over a subset of  $\mathbb{Q}$ , and  $F_{\mathbf{X}_i}$  is the cumulative distribution function for  $\mathbf{X}_i$ . Here we are implicitly assuming some distribution for  $\mathbf{X}_i$  as well. Everywhere else we are conditioning on  $\mathbf{X}$ .

### Proof of Result 6

We prove this result by showing that:

$$E[(\hat{\pi}_0(\mathbf{x}_i) - \pi_0(\mathbf{x}_i))^2 | \hat{\pi}_0(\mathbf{x}_i) > 1] > E[(\hat{\pi}_0^C(\mathbf{x}_i) - \pi_0(\mathbf{x}_i))^2 | \hat{\pi}_0(\mathbf{x}_i) > 1] \quad (1)$$

and:

$$E[(\hat{\pi}_0(\mathbf{x}_i) - \pi_0(\mathbf{x}_i))^2 | \hat{\pi}_0(\mathbf{x}_i) < 0] > E[(\hat{\pi}_0^C(\mathbf{x}_i) - \pi_0(\mathbf{x}_i))^2 | \hat{\pi}_0(\mathbf{x}_i) < 0]. \quad (2)$$

Then, we can combine them as follows:

$$\begin{aligned}
& E[(\hat{\pi}_0(\mathbf{x}_i) - \pi_0(\mathbf{x}_i))^2] - E[(\hat{\pi}_0^C(\mathbf{x}_i) - \pi_0(\mathbf{x}_i))^2] = \\
& = E[(\hat{\pi}_0(\mathbf{x}_i) - \pi_0(\mathbf{x}_i))^2 | \hat{\pi}_0(\mathbf{x}_i) > 1] - E[(\hat{\pi}_0^C(\mathbf{x}_i) - \pi_0(\mathbf{x}_i))^2 | \hat{\pi}_0(\mathbf{x}_i) > 1] P(\hat{\pi}_0(\mathbf{x}_i) > 1) \\
& + E[(\hat{\pi}_0(\mathbf{x}_i) - \pi_0(\mathbf{x}_i))^2 | \hat{\pi}_0(\mathbf{x}_i) < 0] - E[(\hat{\pi}_0^C(\mathbf{x}_i) - \pi_0(\mathbf{x}_i))^2 | \hat{\pi}_0(\mathbf{x}_i) < 0] P(\hat{\pi}_0(\mathbf{x}_i) < 0) \\
& \geq 0.
\end{aligned}$$

In Eq. (1):

$$\begin{aligned}
& E[(\hat{\pi}_0(\mathbf{x}_i) - \pi_0(\mathbf{x}_i))^2 | \hat{\pi}_0(\mathbf{x}_i) > 1] - E[(\hat{\pi}_0^C(\mathbf{x}_i) - \pi_0(\mathbf{x}_i))^2 | \hat{\pi}_0(\mathbf{x}_i) > 1] = \\
& = E[(\hat{\pi}_0(\mathbf{x}_i) - 1)(\hat{\pi}_0(\mathbf{x}_i) + 1 - 2\pi_0(\mathbf{x}_i)) | \hat{\pi}_0(\mathbf{x}_i) > 1] > 0,
\end{aligned}$$

because in this region  $\hat{\pi}_0(\mathbf{x}_i) + 1 > 2 \geq 2\pi_0(\mathbf{x}_i)$ .

In Eq. (2):

$$\begin{aligned}
& E[(\hat{\pi}_0(\mathbf{x}_i) - \pi_0(\mathbf{x}_i))^2 | \hat{\pi}_0(\mathbf{x}_i) < 0] - E[(\hat{\pi}_0^C(\mathbf{x}_i) - \pi_0(\mathbf{x}_i))^2 | \hat{\pi}_0(\mathbf{x}_i) < 0] = \\
& = E[(a - \hat{\pi}_0(\mathbf{x}_i))(2\pi_0(\mathbf{x}_i) - \hat{\pi}_0(\mathbf{x}_i) - 0) | \hat{\pi}_0(\mathbf{x}_i) < 0] > 0,
\end{aligned}$$

because in this region  $2\pi_0(\mathbf{x}_i) \geq 0 > \hat{\pi}_0(\mathbf{x}_i)$ .

## 2 Functions $\pi_0(\mathbf{x}_i)$ used in simulation scenarios

Below, we refer to scenarios I-IV, as in Figure 3:

In scenarios I-IV, the values of  $x_1$  are equally spaced between 0 and 1, with the number of points being equal to  $m$ , the number of features considered.

- Scenario I:  $\pi_0(x_1) = 0.9$
- Scenario II:  $\pi_0(x_1) = \pi_{01}(x_1) + \pi_{02}(x_1) + 0.12\pi_{03}(x_1)$ , where:

$$\pi_{01}(x_1) = \begin{cases} 1 & \text{if } 0 \leq x_1 \leq 0.5 \\ -4/1.96(x_1 + 0.2)(x_1 - 1.2) & \text{if } 0.5 < x_1 < 0.7 \\ 4/1.96 \times 0.45 & \text{if } 0.7 \leq x_1 \leq 1, \end{cases} \quad \pi_{02}(x_1) = \begin{cases} 0 & \text{if } 0 \leq x_1 < 0.7 \\ -2.5(x - 0.7)^2 & \text{if } 0.7 \leq x_1 \leq 1 \end{cases}$$

$$\pi_{03}(x_1) = \begin{cases} 0 & \text{if } 0 \leq x_1 \leq 0.1 \\ -(x - 0.1)^2 & \text{if } 0.1 < x_1 < 0.7 \\ -0.36 & \text{if } 0.7 \leq x_1 \leq 1. \end{cases}$$

- Scenario III:

$$\pi_0(x_1, x_2) = \begin{cases} \pi_{01}(x_1) + \pi_{02}(x_1) + 0.12\pi_{03}(x_1) & \text{if } x_2 = 1 \\ \pi_{01}(x_1) + 0.5\pi_{02}(x_1) + 0.06\pi_{03}(x_1) & \text{if } x_2 = 2 \\ \pi_{01}(x_1) + 0.3\pi_{02}(x_1) & \text{if } x_2 = 3, \end{cases}$$

where  $x_2$  is defined by first randomly generating  $m$  points from  $\text{Unif}(0, 0.5)$ , then creating discrete categories by using the thresholds 0.127 and 0.302 and  $\pi_{01}, \pi_{02}, \pi_{03}$  are defined as in Scenario II.

- Scenario IV:  $\pi_0(x_1, x_2)$  is the same function as in scenario III multiplied by 0.6.

### **3 Supplementary figures**

Figure S1: Simulation scenarios with  $m=1,000$  features and normally-distributed independent test statistics (Table 3) showing the true function  $\pi_0(\mathbf{x}_i)$  in black and the empirical means of  $\hat{\pi}_0(\mathbf{x}_i)$ , assuming different modelling approaches in the orange (for our approach, Boca-Leek = BL), blue (for the Scott approach with the theoretical null = Scott T), and brown for the Storey approach.

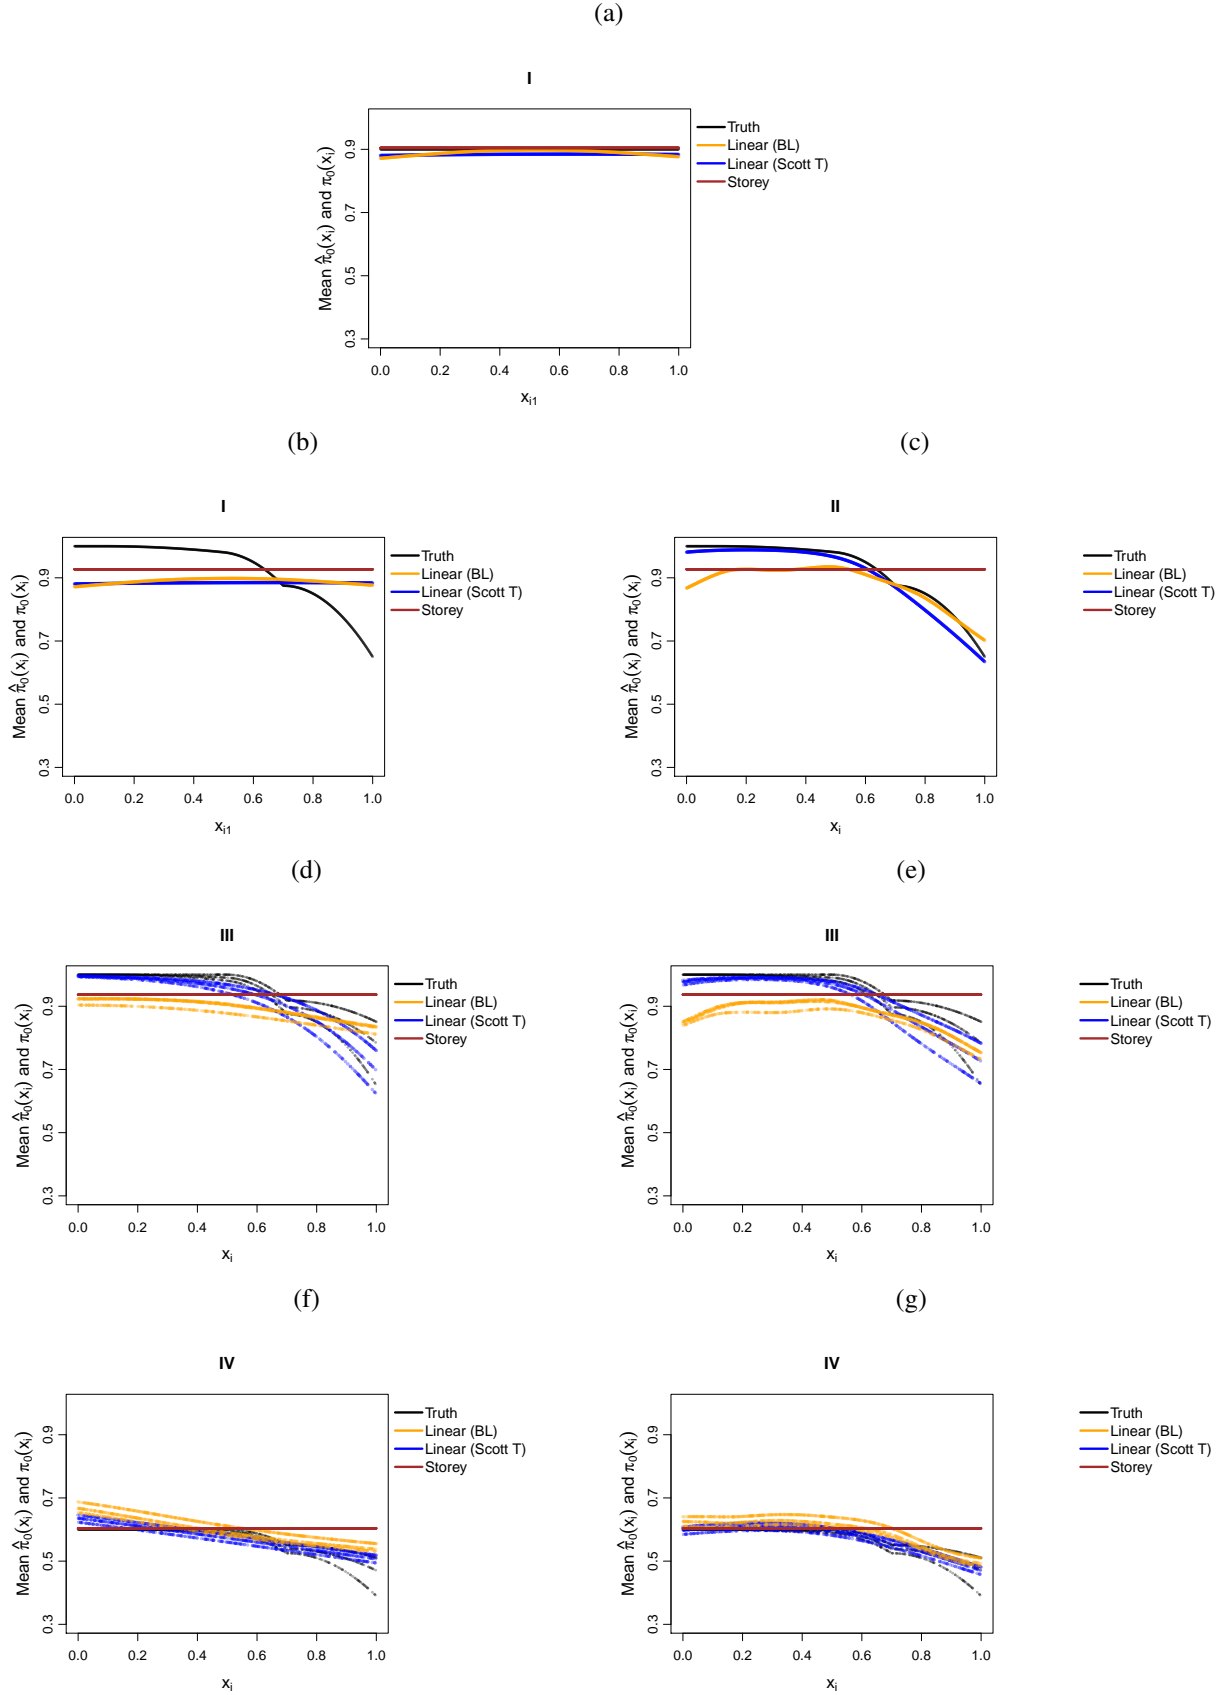

Figure S2: Simulation scenarios with  $m=1,000$  features and  $t$ -distributed independent test statistics (Table 3) showing the true function  $\pi_0(\mathbf{x}_i)$  in black and the empirical means of  $\hat{\pi}_0(\mathbf{x}_i)$ , assuming different modelling approaches in the orange (for our approach, Boca-Leek = BL), blue (for the Scott approach with the theoretical null = Scott T), and brown for the Storey approach.

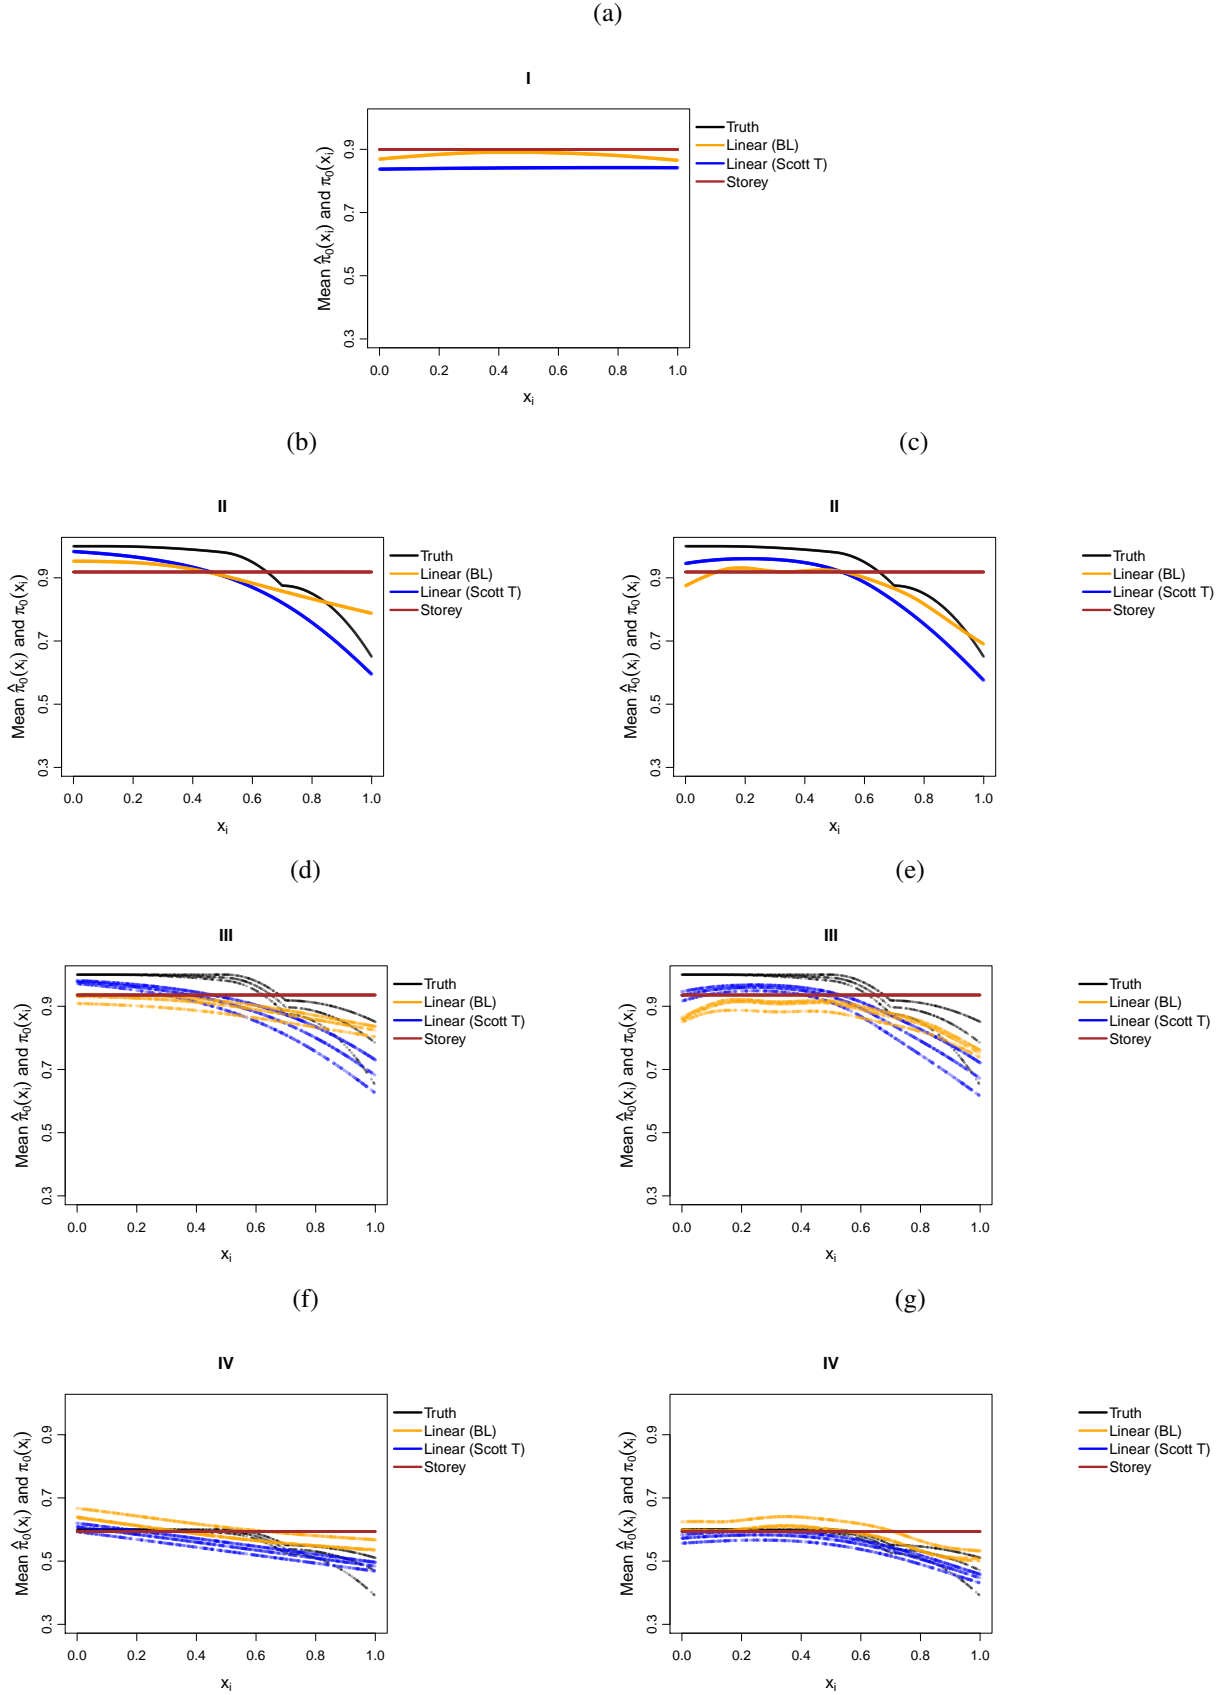

Figure S3: Simulation scenarios with  $m=10,000$  features and normally-distributed independent test statistics (Table 4) showing the true function  $\pi_0(\mathbf{x}_i)$  in black and the empirical means of  $\hat{\pi}_0(\mathbf{x}_i)$ , assuming different modelling approaches in the orange (for our approach, Boca-Leek = BL), blue (for the Scott approach with the theoretical null = Scott T), and brown for the Storey approach.

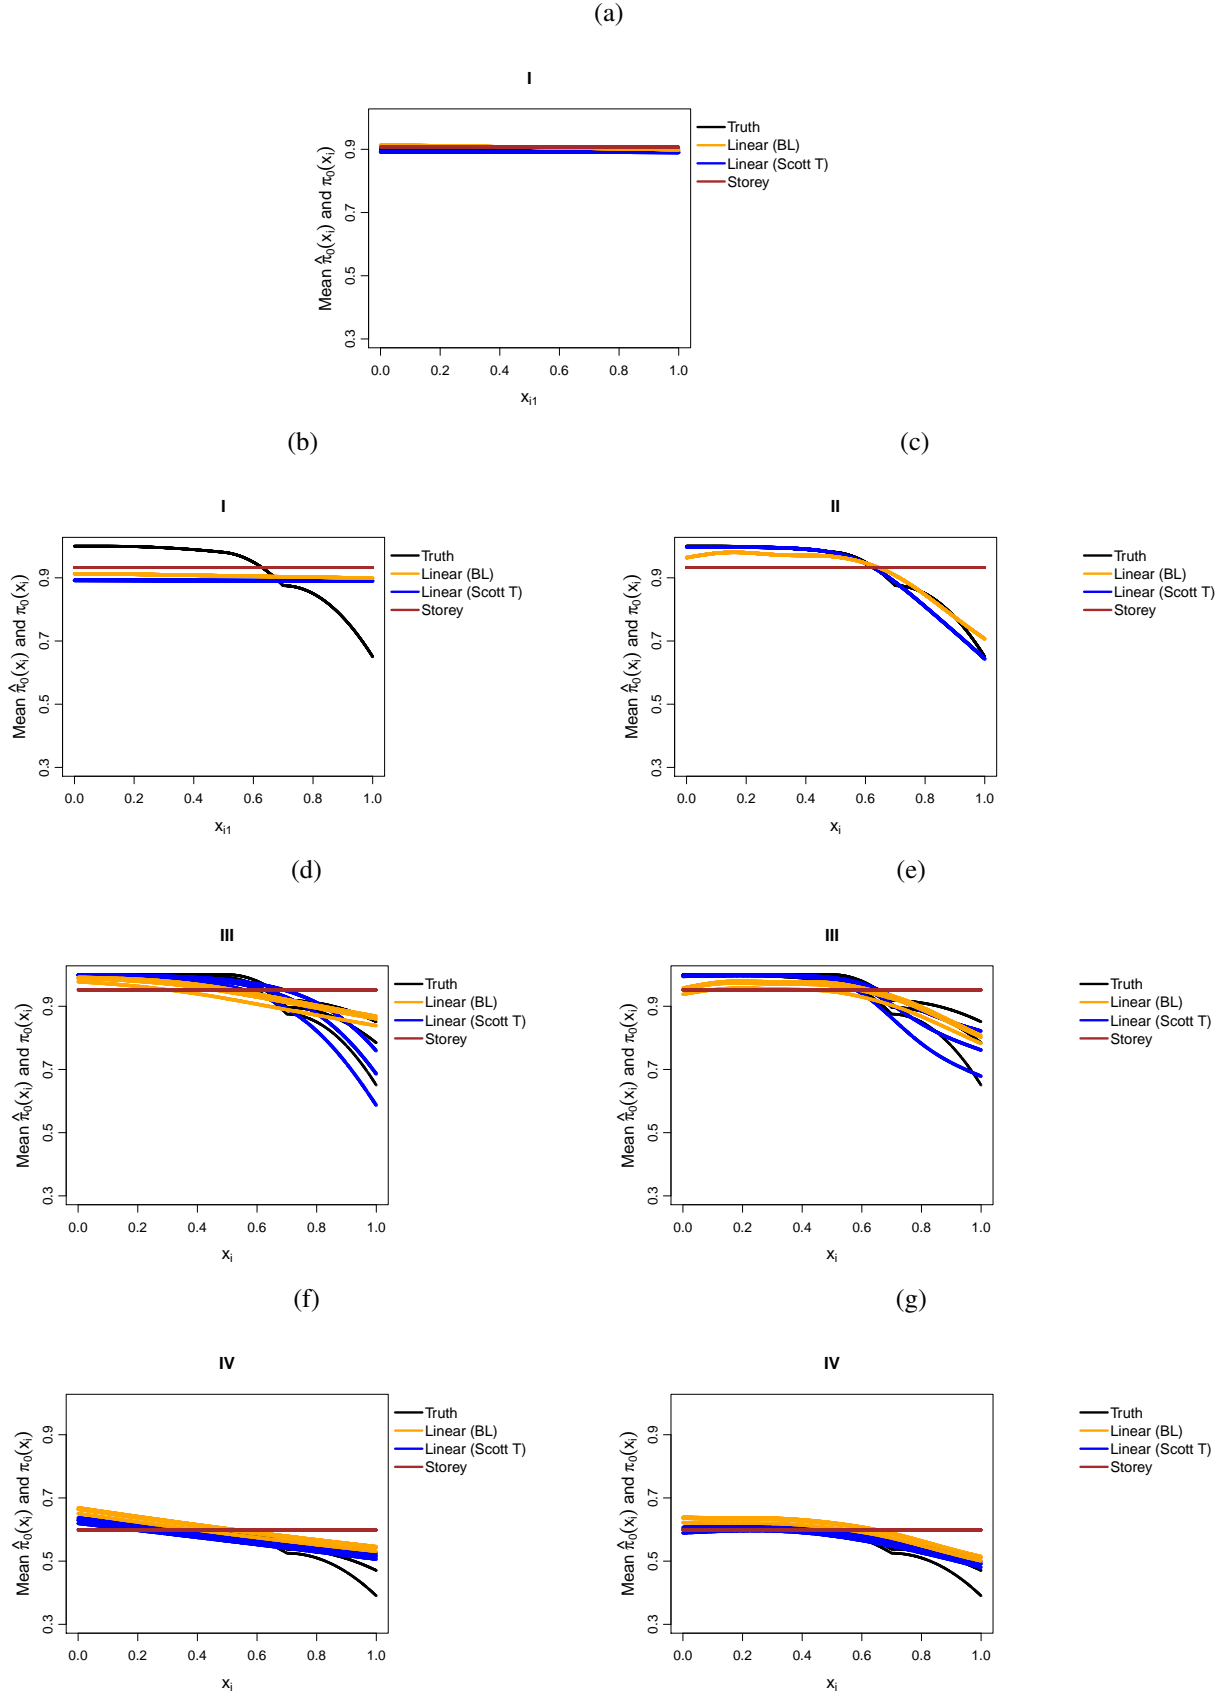

Figure S4: Simulation scenarios with  $m=10,000$  features and t-distributed independent test statistics (Table 4) showing the true function  $\pi_0(\mathbf{x}_i)$  in black and the empirical means of  $\hat{\pi}_0(\mathbf{x}_i)$ , assuming different modelling approaches in the orange (for our approach, Boca-Leek = BL), blue (for the Scott approach with the theoretical null = Scott T), and brown for the Storey approach.

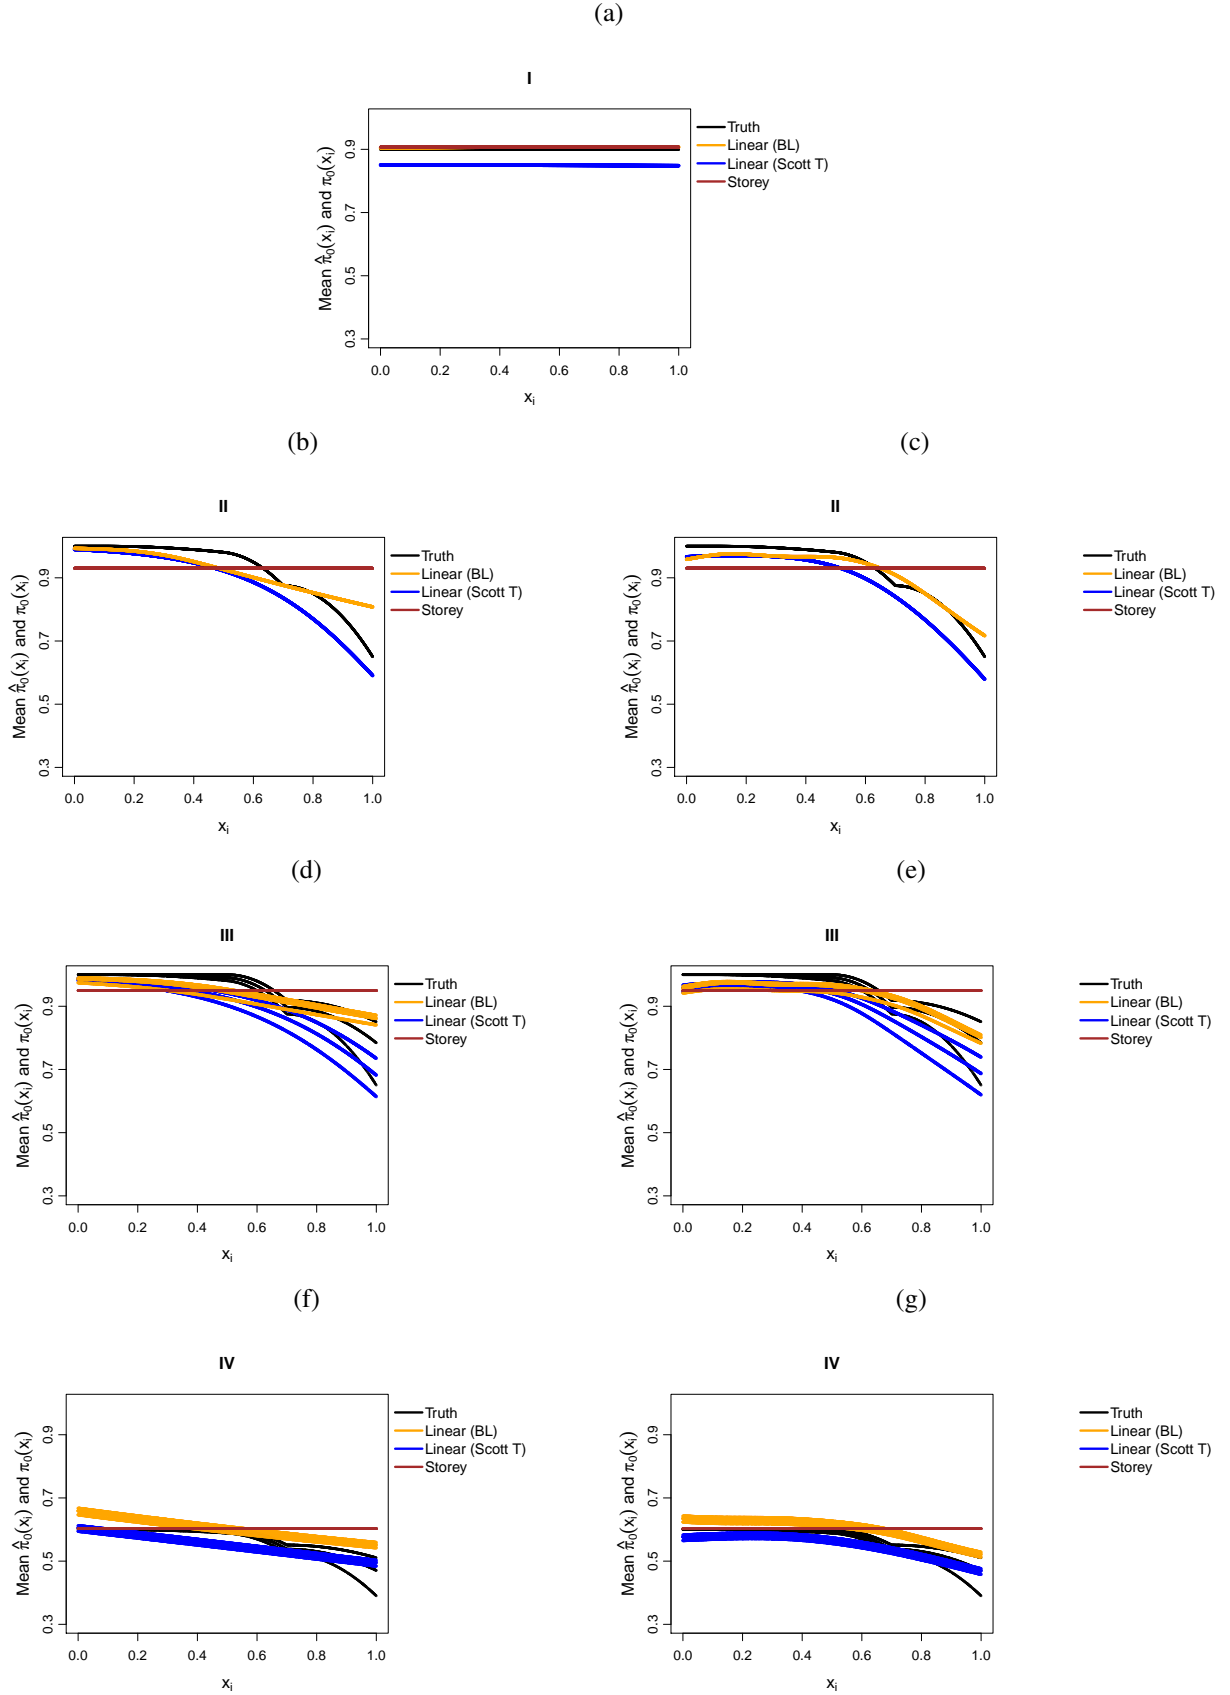

Figure S5: Diagnostic plots for assessing whether, in the BMI GWAS meta-analysis, the p-values and the covariates are conditionally independent under the null. Panel a) stratifies according to N, splitting up the dataset into 8 approximately equal datasets, panel b) uses the MAF stratification

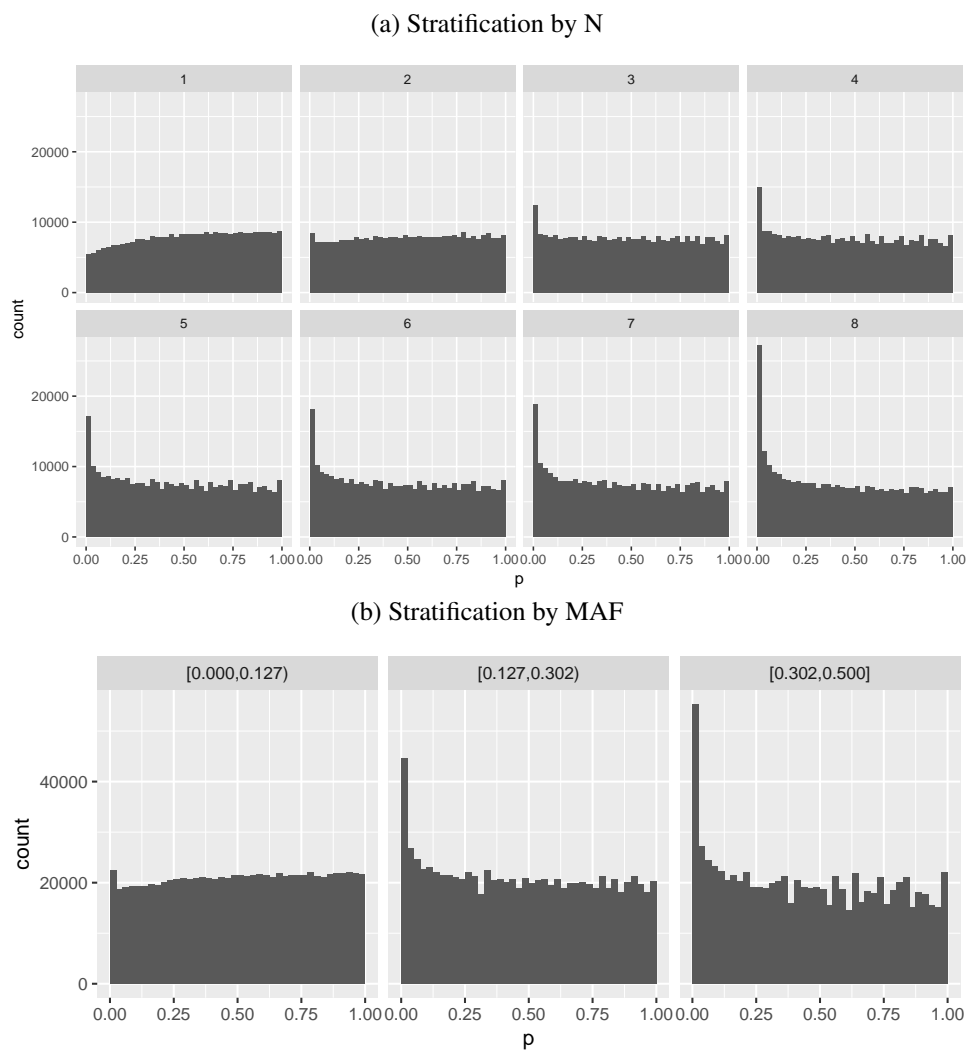

Supplement: Supplementary file [file 035675-1.pdf]
